# Supplementary material for: Progress and prospects of dealloying methods for energy-conversion electrocatalysis
Source: Royal Society of Chemistry journal article supplement (doi:10.1039/d3dt00449j), 2023-01-01
Supplement: d3dt00449j1.pdf [file d3dt00449j1.pdf]

**Table 1. The hydrogen evolution performance of HER electrocatalysts**

| Electrocatalysts                                                                                | Dealloying method | Electrolyte                          | Tafel Slope (mV dec <sup>-1</sup> ) | $j$ (mA cm <sup>-2</sup> ) | Overpotential (mV vs. RHE) | Ref. |
|-------------------------------------------------------------------------------------------------|-------------------|--------------------------------------|-------------------------------------|----------------------------|----------------------------|------|
| Ag <sub>2</sub> S/CuS                                                                           | Chemical          | 0.5 M H <sub>2</sub> SO <sub>4</sub> | 75                                  | 10                         | ~200                       | S1   |
| Pt <sub>3</sub> Co/C                                                                            | Chemical          | 0.1 M KOH                            | 34                                  | 10                         | 280                        | S2   |
| Al <sub>82</sub> Ni <sub>6</sub> Co <sub>3</sub> Mn <sub>3</sub> Y <sub>3</sub> Au <sub>3</sub> | Chemical          | 0.5 M H <sub>2</sub> SO <sub>4</sub> | 43                                  | 10                         | 24                         | S3   |
| PdPtCuNiP                                                                                       | Chemical          | 1.0 M KOH                            | 37.4                                | 10                         | 32                         | S4   |
| (Co <sub>0.52</sub> Fe <sub>0.48</sub> ) <sub>2</sub> P                                         | Electrochemical   | 0.5 M H <sub>2</sub> SO <sub>4</sub> | 45                                  | 10                         | 64                         | S5   |
| C-Co <sub>2</sub> P                                                                             | Electrochemical   | 1.0 M KOH                            | 36.9                                | 10                         | 30                         | S6   |
| Ni(Cu)/NF                                                                                       | Electrochemical   | 1.0 M KOH                            | 33.3                                | 10                         | 27                         | S7   |
| Co <sub>65</sub> Mo <sub>15</sub> P <sub>20</sub>                                               | Electrochemical   | 1.0 M KOH                            | 46.2                                | 10                         | 40.8                       | S8   |
| PdCu <sub>3</sub>                                                                               | Electrochemical   | 0.5 M H <sub>2</sub> SO <sub>4</sub> | 34                                  | 25                         | ~69                        | S9   |

**Table 2. The oxygen evolution performance of OER electrocatalysts**

| Electrocatalysts                                        | Dealloying method | Electrolyte                           | Tafel Slope (mV dec <sup>-1</sup> ) | <i>j</i> (mA cm <sup>-2</sup> ) | Overpotential (mV vs. RHE) | Ref. |
|---------------------------------------------------------|-------------------|---------------------------------------|-------------------------------------|---------------------------------|----------------------------|------|
| NiO                                                     | Chemical          | 1.0 M KOH                             | 76.73                               | 20                              | 356                        | S10  |
| Ni-Fe-O                                                 | Chemical          | 1.0 M KOH                             | 39                                  | 10                              | 244                        | S11  |
| CoFe-LDH                                                | Chemical          | 1.0 M KOH                             | 45                                  | 10                              | 286                        | S12  |
| P-IrCu <sub>1.4</sub> NCs                               | Chemical          | 0.05 M H <sub>2</sub> SO <sub>4</sub> | 53.9                                | 12.8                            | 1550                       | S13  |
| FeCo(Mn)-O/NF                                           | Chemical          | 1.0 M KOH                             | 44.5                                | 10                              | 235                        | S14  |
| (Co <sub>0.52</sub> Fe <sub>0.48</sub> ) <sub>2</sub> P | Electrochemical   | 1.0 M KOH                             | 30                                  | 10                              | 270                        | S5   |
| FeNiNbPC                                                | Electrochemical   | 6.0 M KOH                             | 36.1                                | 10                              | 248                        | S15  |
| NP-Ru <sub>x</sub>                                      | Electrochemical   | 1.0 M KOH                             | 15                                  | 10                              | 245                        | S16  |

**Table 3. The oxygen reduction performance of ORR electrocatalysts  
(Electrolyte: 0.1 M HClO<sub>4</sub>)**

| Electrocatalysts     | Dealloying method | MA (0.9 V)<br>(A/mg <sub>Pt</sub> ) | SA (0.9 V)<br>(mA/cm <sup>2</sup> ) | Half-wave Potential/V | Ref. |
|----------------------|-------------------|-------------------------------------|-------------------------------------|-----------------------|------|
| Pt-Co/C-2h           | Chemical          | ~0.43                               | —                                   | —                     | S17  |
| Pt <sub>3</sub> Co/C | Chemical          | 0.26                                | 0.55                                | 0.92                  | S18  |
| PtNi <sub>3</sub> /C | Chemical          | 0.6                                 | 0.51                                | 0.91                  | S19  |
| Cu <sub>3</sub> Pt/C | Electrochemical   | 0.9                                 | 0.45                                | 0.91                  | S20  |
| PtNi <sub>3</sub> /C | Electrochemical   | 0.81                                | 2.27                                | 0.92                  | S21  |
| Pt-Cu-Co             | Electrochemical   | 0.49                                | 0.44                                | —                     | S22  |
| Au-Ni                | Electrochemical   | —                                   | 0.46                                | 0.91                  | S23  |
| PtCu <sub>3</sub> /C | Electrochemical   | 0.44                                | —                                   | ~0.91                 | S24  |

---

## References

- S1 H. Ren, W. Xu, S. Zhu, Z. Cui, X. Yang and A. Inoue, *Electrochim. Acta*, 2016, **190**, 221-228.
- S2 M. Saquib and A. Halder, *J. Solid State Chem.*, 2018, **262**, 229-236.
- S3 X. Liu, S. Ju, P. Zou, L. Song, W. Xu, J. Huo, J. Yi, G. Wang and J.-Q. Wang, *J. Alloy. Compd.*, 2021, **880**, 160548.
- S4 Z. Jia, K. Nomoto, Q. Wang, C. Kong, L. Sun, L.-C. Zhang, S.-X. Liang, J. Lu and J. J. Kruzic, *Adv. Funct. Mater.*, 2021, **31**, 2101586.
- S5 Y. Tan, H. Wang, P. Liu, Y. Shen, C. Cheng, A. Hirata, T. Fujita, Z. Tang and M. Chen, *Energy Environ. Sci.*, 2016, **9**, 2257–2261.
- S6 W. Xu, G. Fan, S. Zhu, Y. Liang, Z. Cui, Z. Li, H. Jiang, S. Wu and F. Cheng, *Adv. Funct. Mater.*, 2021, **31**, 2107333.
- S7 Q. Sun, Y. Dong, Z. Wang, S. Yin and C. Zhao, *Small*, 2018, **14**, 1704137.
- S8 W. Tang, S. Zhu, H. Jiang, Y. Liang, Z. Li, S. Wu and Z. Cui, *J. Colloid. Interf. Sci.*, 2022, **625**, 606–613.
- S9 R. Jana, A. Bhim, P. Bothra, S. K. Pati and S. C. Peter, *ChemSusChem*, 2016, **9**, 2922-2927.
- S10 X. Ren, Y. Zhai, Q. Zhou, J. Yan and S. Liu, *J. Energy Chem.*, 2020, **50**, 125–134.
- S11 C. Dong, T. Kou, H. Gao, Z. Peng and Z. Zhang, *Adv. Energy Mater.*, 2018, **8**, 1701347.
- S12 L. Han, C. Dong, C. Zhang, Y. Gao, J. Zhang, H. Gao, Y. Wang and Z. Zhang, *Nanoscale*, 2017, **9**, 16467–16475
- S13 Y. Pi, J. Guo, Q. Shao and X. Huang, *Chem. Mater.*, 2018, **30**, 8571–8578.
- S14 S.-N. Wu, Y.-F. Qi, Q. Wang, X.-G. Wang, X.-J. Zhao and E.-C. Yang, *ChemElectroChem*, 2020, **7**, 684–690.
- S15 L. Xiao, Y. Liang, Z. Li, S. Wu, S. Luo, H. Sun, S. Zhu and Z. Cui, *J. Colloid. Interf. Sci.*, 2022, **608**, 1973–1982.
- S16 G. Xi, L. Zuo, X. Li, Y. Jin, R. Li and T. Zhang, *J. Mater. Sci. Technol.*, 2021, **70**, 197–204.
- S17 F. J. Lai, W. N. Su, L. S. Sarma, D. G. Liu, C. A. Hsieh, J. F. Lee and B. J. Hwang, *Chem. Eur. J.*, 2010, **16**, 4602–4611.
- S18 Y. Chen, Y. Chen, Y. Liao and S. Chen, *Chem. Res. Chin. Univ.*, 2022, **38**, 991–998.
- S19 L. Gan, M. Heggen, S. Rudi and P. Strasser, *Nano Lett.*, 2012, **12**, 5423–5430.

---

S20 D. Wang, Y. Yu, J. Zhu, S. Liu, D.A. Muller and H. D. Abruña, *Nano Lett.*, 2015, **15**, 1343–1348.

S21 L. Gan, M. Heggen, S. Rudi and P. Strasser, *Nano Lett.*, 2012, **12**, 5423–5430.

S22 R. Srivastava, P. Mani, N. Hahn and P. Strasser, *Angew. Chem. Int. Ed.*, 2007, **46**, 8988–8991.

S23 J. Wang, F. Chen, Y. Jin, Y. Lei and R. L. Johnston, *Adv. Funct. Mater.*, 2017, **27**, 1700260.

S24 S. Koh and P. Strasser, *J. Am. Chem. Soc.*, 2007, **129**, 12624–12625.
